# Supplementary material for: Integrative Bioinformatic and Functional Analyses of Potential Genes in Female Patients with Non-Small-Cell Lung Cancer
Source: Research Square preprint supplement (doi:10.21203/rs.3.rs-386332/v1), 2021-04-09
Supplement: Supplementary file 2 [file c92991b4cd4e3e21c97a9e1a.docx]

**Primers sequences used for qRT-PCR**

| Human | Forward | Reverse |
| --- | --- | --- |
| IL6 | GAGATACCACTCCCAACAGACC | AAGTGCATCATCGTTGTTCATACA |
| EGF | TCTGAACCCGGACGGATTG | GACATCGCTCGCGAACGTAG |
| MMP9 | GAGATGCGTGGAGAGTCGAA | CCGAGTTGGAACCACGACGC |
| GAPDH | GGAGCGAGATCCCTCCAAAAT | GGCTGTTGTCATACTTCTCATGG |
